# Supplementary material for: Intestinal bioavailability of n-3 long-chain polyunsaturated fatty acids influenced by the supramolecular form of phospholipids
Source: Royal Society of Chemistry journal article supplement (doi:10.1039/c9fo02953b), 2020-01-01
Supplement: c9fo02953b1.pdf [file c9fo02953b1.pdf]

**Supplementary data 1:** Phospholipid composition of marine phospholipids extracted from marine lecithin

|                          | Marine phospholipids                 |
|--------------------------|--------------------------------------|
|                          | <i>g/100g of total phospholipids</i> |
| Phosphatidylcholine      | 73.8                                 |
| Phosphatidylinositol     | 3.5                                  |
| Phosphatidylethanolamine | 5.2                                  |
| Phosphatidylserine       | -                                    |
| Phosphatidic acid        | 1.2                                  |
| Sphingomyelin            | 2.9                                  |
| Lyso-phosphatidylcholine | 9.2                                  |

SFA: saturated fatty acids, MUFA: monounsaturated fatty acids, PUFA: polyunsaturated fatty acids.
