# Supplementary material for: Intestinal bioavailability of n-3 long-chain polyunsaturated fatty acids influenced by the supramolecular form of phospholipids
Source: Royal Society of Chemistry journal article supplement (doi:10.1039/c9fo02953b), 2020-01-01
Supplement: c9fo02953b2.pdf [file c9fo02953b2.pdf]

**Supplementary data 2:** Distribution of main fatty acids on the glycerol backbone of marine phospholipids

|            | Marine phospholipids                              |
|------------|---------------------------------------------------|
|            | <i>% esterified in the internal sn-2 position</i> |
| Σ SFA      | 13.2                                              |
| 16:0       | 12.3                                              |
| 18:0       | 27.7                                              |
| Σ MUFA     | 33.1                                              |
| 18:1 n-9   | 55.1                                              |
| Σ PUFA     | 76.4                                              |
| Σ n-6 PUFA | 53.3                                              |
| 18:2 n-6   | 46.1                                              |
| 20:4 n-6   | 79.2                                              |
| Σ n-3 PUFA | 77.0                                              |
| 18:3 n-3   | 36.6                                              |
| 20:5 n-3   | 78.0                                              |
| 22:6 n-3   | 79.9                                              |

SFA: saturated fatty acids, MUFA: monounsaturated fatty acids, PUFA: polyunsaturated fatty acids.
