# Supplementary material for: Intestinal bioavailability of n-3 long-chain polyunsaturated fatty acids influenced by the supramolecular form of phospholipids
Source: Royal Society of Chemistry journal article supplement (doi:10.1039/c9fo02953b), 2020-01-01
Supplement: c9fo02953b3.pdf [file c9fo02953b3.pdf]

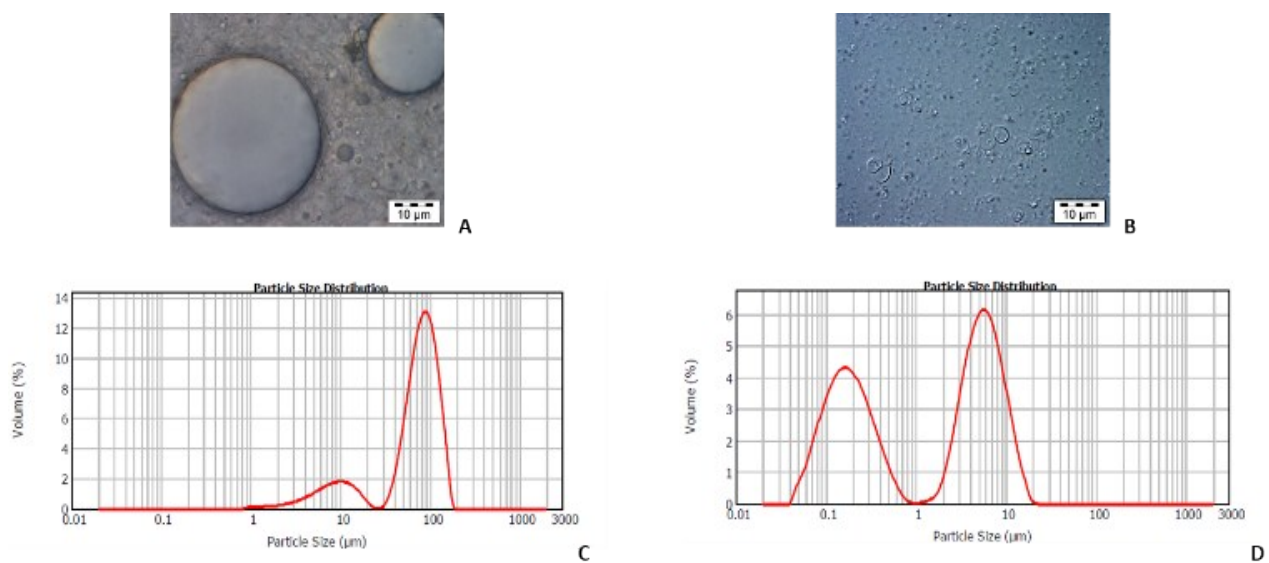

**Supplementary data 3** : Optical microscopy images of (A) O/W emulsion stabilized by marine PL (13 wt.%) and (B) liposomes based on marine PLs
